# Supplementary material for: A novel strategy to fabricate multifunctional Fe3O4@C@TiO2 yolk–shell structures as magnetically recyclable photocatalysts
Source: Royal Society of Chemistry journal article supplement (doi:10.1039/c4nr00175c), 2014-01-01
Supplement: c4nr00175c1.pdf [file c4nr00175c1.pdf]

## Electronic Supplementary Information For

# Novel Strategy to Fabricate Multifunctional $\text{Fe}_3\text{O}_4@\text{C}@\text{TiO}_2$ Yolk-Shell Structures as a Magnetically Recyclable Photocatalyst

Lulu Chen,<sup>a, b</sup> Lu Li,<sup>a</sup> Tingting Wang,<sup>c</sup> Lingyu Zhang,<sup>a</sup> Shuangxi Xing,<sup>\* a</sup>  
Chungang Wang,<sup>\*a</sup> and Zhongmin Su<sup>a</sup>

<sup>a</sup> Faculty of Chemistry, Northeast Normal University, Changchun, 130024 (P.R. China).

E-mail: wangcg925@nenu.edu.cn; xingsx737@nenu.edu.cn

<sup>b</sup> Key Laboratory for Photonic and Electric Bandgap Materials, Ministry of Education, Harbin Normal University, Harbin, 150025 (P. R. China).

<sup>c</sup> School of Chemistry & Environmental, Changchun University of Science and Technology, Changchun, 130022 (P.R. China).

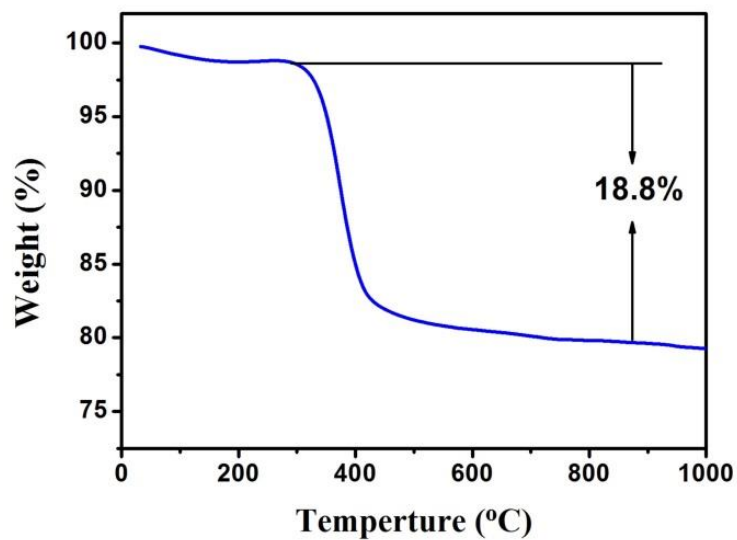

Figure S1. Thermogravimetric analysis (TG) curve of the  $\text{Fe}_3\text{O}_4@\text{C}@\text{TiO}_2$  yolk-shell NCs.

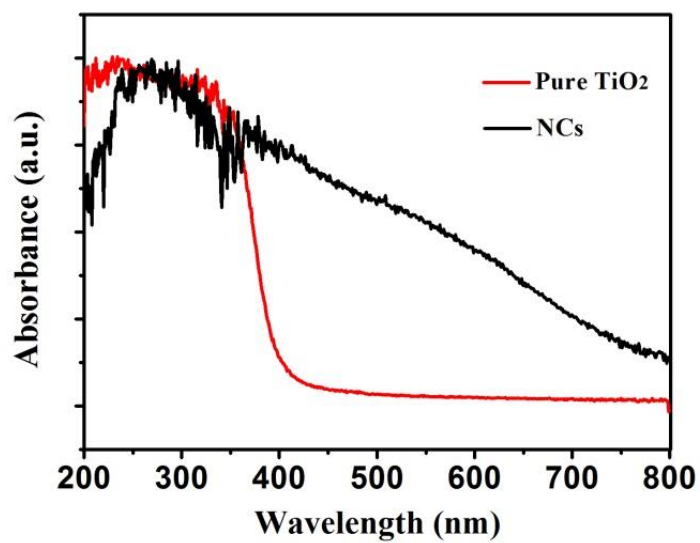

Figure S2. UV-vis diffuse reflectance spectra (DRS) of pure  $\text{TiO}_2$  and  $\text{Fe}_3\text{O}_4@\text{C}@\text{TiO}_2$  yolk-shell NCs.

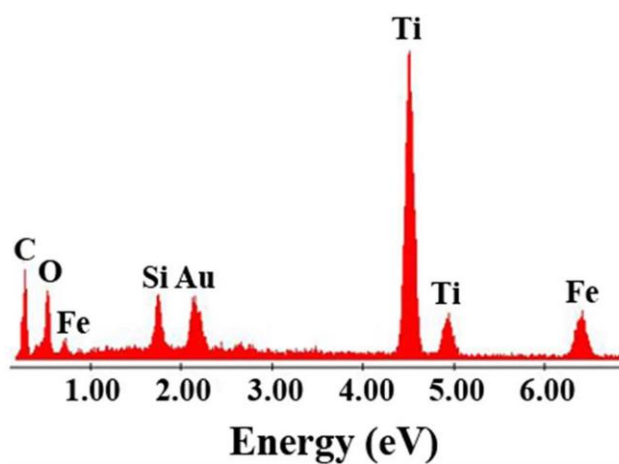

Figure S3. Energy dispersive X-ray (EDX) spectrum of  $\text{Fe}_3\text{O}_4@\text{C}@\text{TiO}_2$  yolk-shell NCs.

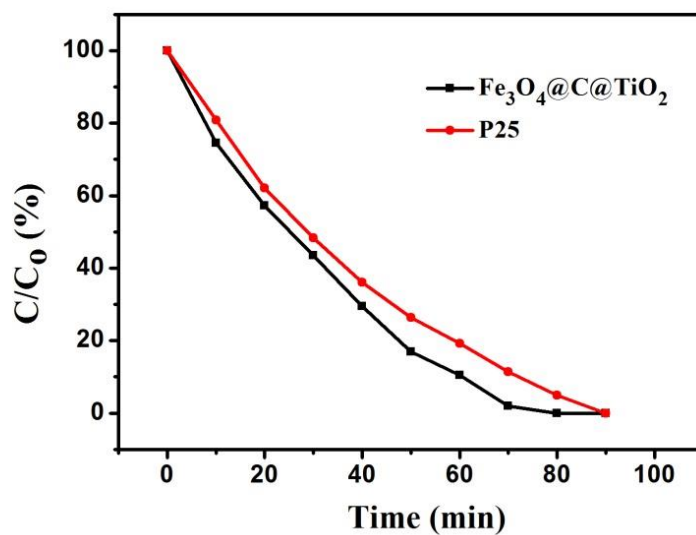

Figure S4. The photodegradation of RhB by using the  $\text{Fe}_3\text{O}_4@\text{C}@\text{TiO}_2$  yolk-shell NCs and Degussa P25  $\text{TiO}_2$ .
